# Supplementary material for: Modified vapor phase deposition technology for high-performance uncooled MIR PbSe detectors
Source: Royal Society of Chemistry journal article supplement (doi:10.1039/d1ra06144e), 2021-01-01
Supplement: d1ra06144e1.pdf [file d1ra06144e1.pdf]

## Supporting Information

# Modified Vapor Phase Deposition Technology for High-performance Uncooled MIR PbSe Detectors

*Jijun Qiu,\*<sup>a</sup> Yun Liu,<sup>a</sup> Guodong Zhang,<sup>a</sup> Kanghao Shi,<sup>a</sup> Yanzhen Li,<sup>a</sup> Yingmin Luo,<sup>a</sup>*

School of Microelectronics, Dalian University of Technology, Dalian, PR China

E-mail: [jjqiu@dlut.edu.cn](mailto:jjqiu@dlut.edu.cn)

### Contents:

**Figure S1.** Typical FESEM images of modified VPD-PbSe films obtained from various parameters.

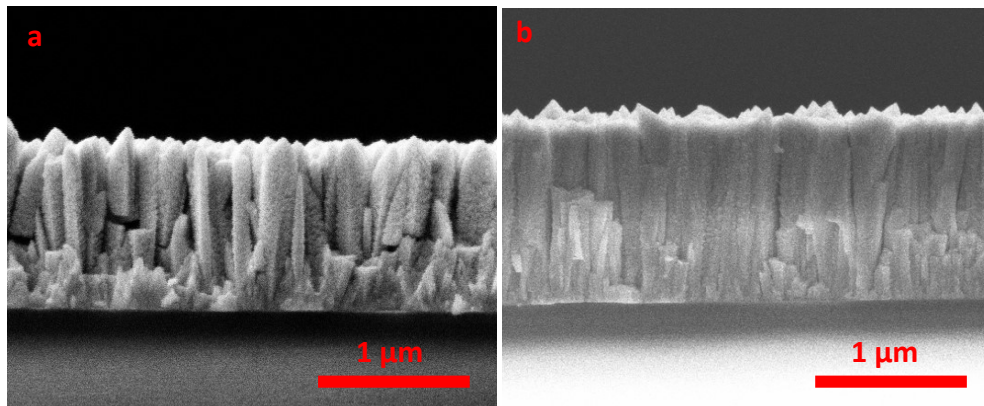

Figure S1 Typical FESEM images of modified VPD-PbSe films obtained from various parameters. (a) 130 °C and  $2 \times 10^{-2}$  Pa  $O_2$  pressure (b) 130 °C and  $8 \times 10^{-2}$  Pa  $O_2$  pressure.
